# Supplementary material for: Diverse Electronic and Magnetic Properties of Chlorination-Related Graphene Nanoribbons
Source: PubMed Central journal article supplement (PMC6294761; doi:10.1038/s41598-018-35627-6), 2018-12-14
Supplement: 41598_2018_35627_MOESM1_ESM.pdf [file 41598_2018_35627_MOESM1_ESM.pdf]

# Diverse Electronic and Magnetic Properties of Chlorination-Related Graphene Nanoribbons

Duy Khanh Nguyen<sup>1</sup>, Ngoc Thanh Thuy Tran<sup>2</sup>, Thanh Tien Nguyen<sup>3</sup>, and Ming-Fa Lin<sup>4,\*</sup>

<sup>1</sup>Department of Physics, National Cheng Kung University, Tainan 701, Taiwan

<sup>2</sup>Hierarchical Green-Energy Materials (Hi-GEM) Research Center, National Cheng Kung University, Tainan 701, Taiwan

<sup>3</sup>Department of Physics, College of Natural Sciences, Can Tho University, 3-2 Road, Can Tho, Viet Nam

<sup>4</sup>Hi-GEM/Quantum Topology Research Center, National Cheng Kung University, Tainan 701, Taiwan

\*[mflin@mail.ncku.edu.tw](mailto:mflin@mail.ncku.edu.tw)

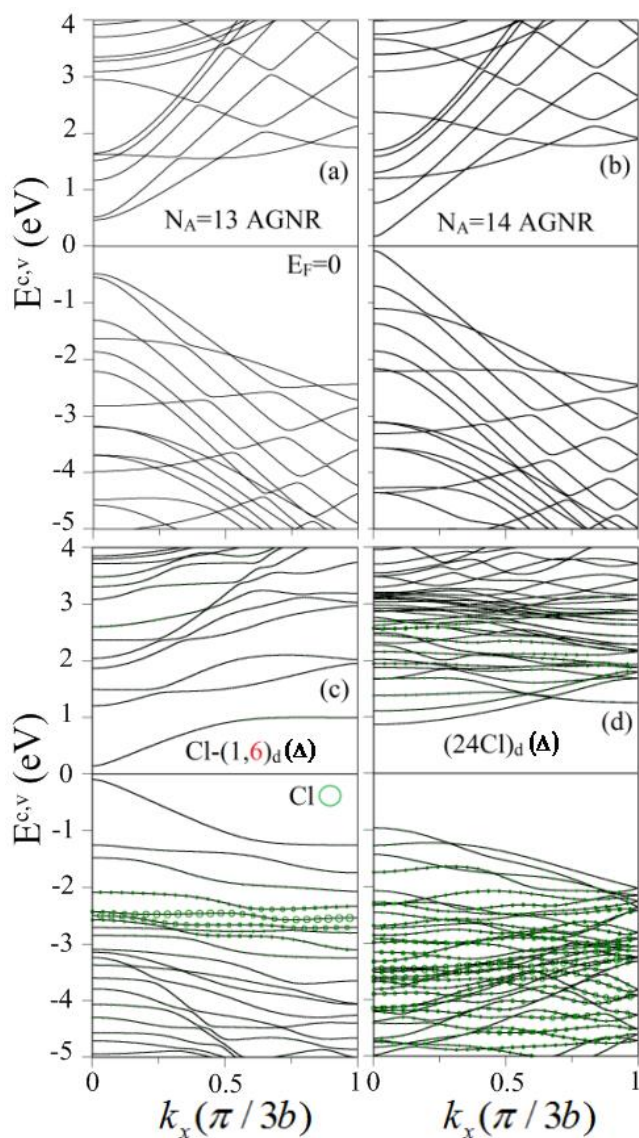

Supplementary Figure. S1. Band structures of (a)  $N_A=13$  AGNR, (b)  $N_A=14$  AGNR, (c)  $\text{Cl}-(1,6)_d$  and (d)  $(24\text{Cl})_d$ -adsorbed  $N_A=12$  AGNR.  $\Delta$  represents the short Cl-C distance.

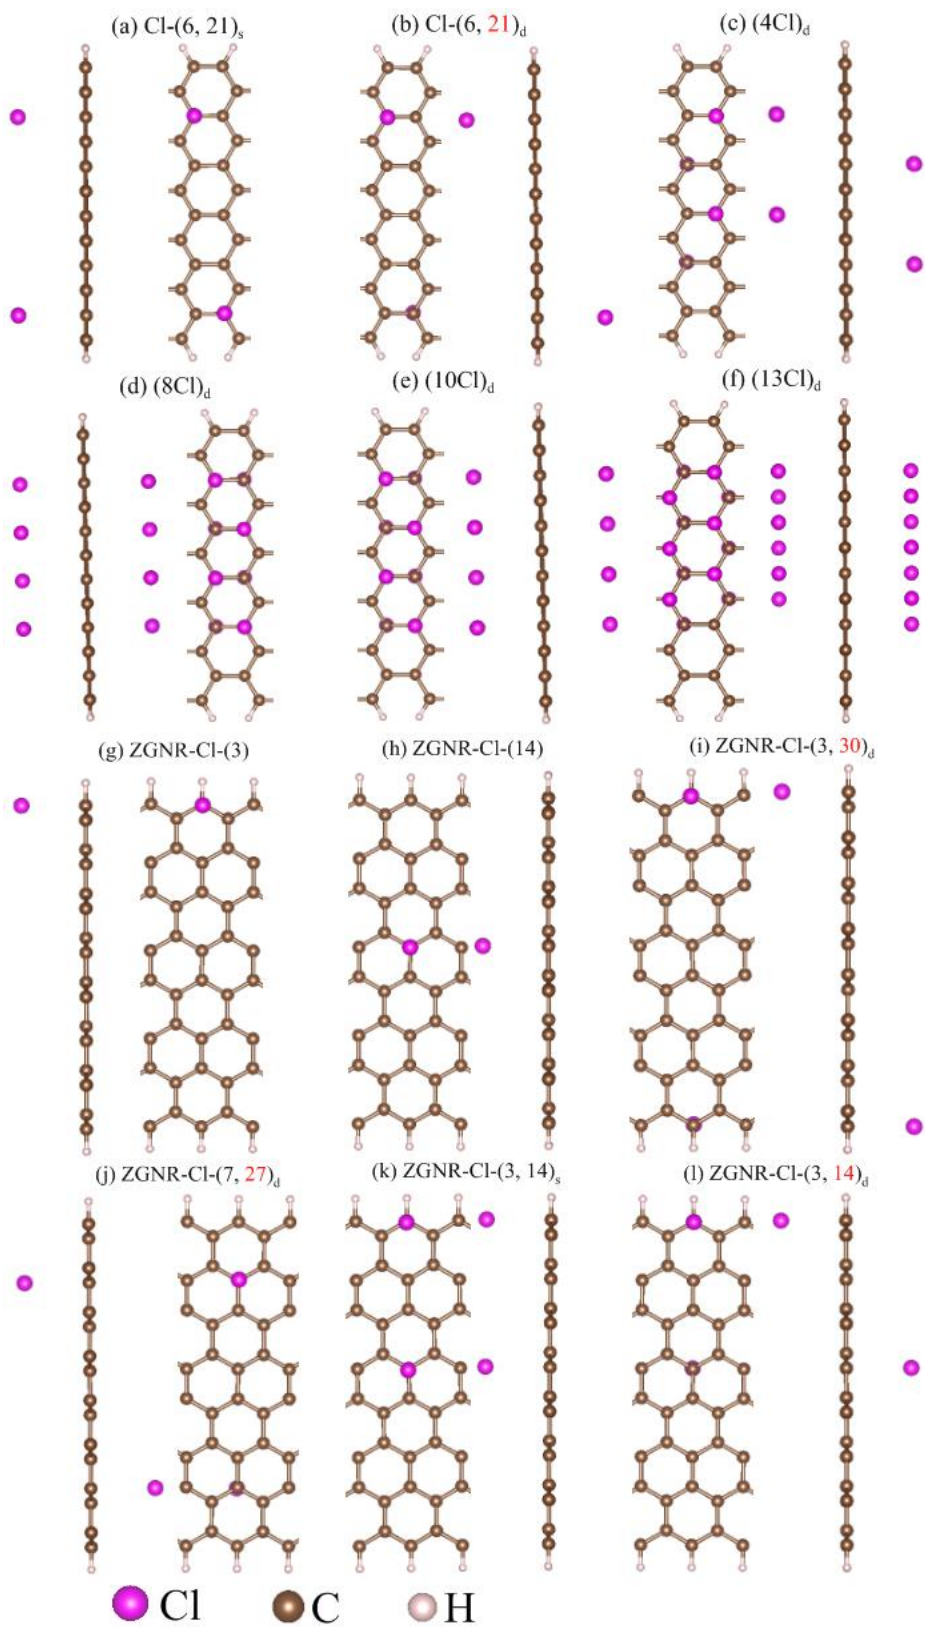

Supplementary Figure. S2. The top- and side-view geometric structures of halogen adatoms-adsorbed GNRs.
